# Supplementary material for: Ring-closing metathesis in biphasic BMI·PF6ionic liquid/toluene medium: a powerful recyclable and environmentally friendly process
Source: Royal Society of Chemistry journal article supplement (doi:10.1039/b407964g), 2004-01-01
Supplement: b407964g.doc [file b407964g.doc]

Ring-closing metathesis in Biphasic BMI.PF6/toluene medium:

a powerful recyclable and environmentally friendly process.

Hervé Clavier, Nicolas Audic, Marc Mauduit* and Jean-Claude Guillemin*

H. Clavier, Dr. N. Audic, Dr. M. Mauduit, Dr. J.C. Guillemin

UMR CNRS 6052, Laboratoire de Synthèses et Activations de Biomolécules

Ecole Nationale Supérieure de Chimie, Institut de Chimie de Rennes, 35700 Rennes (France)

Fax : 33 (0)2 23 23 81 08

E-mail : [marc.mauduit@ensc-rennes.fr](mailto:marc.mauduit@ensc-rennes.fr)

**General.** 1H (400 MHz), 13C (100 MHz), 31P (162 MHz) and 19F (376.5 MHz) NMR spectra were recorded on a Bruker ARX400 spectrometer with complete proton decoupling for nucleus other than 1H. Chemical shifts are reported in ppm from tetramethylsilane with the solvent resonance as the internal standard (CDCl3, 1H:  7.27 ppm, 13C: 77.0 ppm, CD2Cl2, 1H: 5.31 ppm, 13C: 53.7 ppm and (CD3)2CO: 1H: 2.05 ppm, 13C: 205.1 ppm). Data are reported as follows: chemical shift ( in ppm, multiplicity (s = singlet, d = doublet, t = triplet, q = quadruplet, sept = septuplet, hept = heptuplet, bd = broad, m = multiplet), coupling constants (Hz), integration and attribution. High-resolution mass spectra (HRMS) were recorded at the Centre Régional de Mesures Physiques de l’Ouest (CRMPO), Université de Rennes 1 on a Micromass ZABSpecTOF instrument. Melting points were measured on a heating microscope Reichert and were uncorrected. Optical rotations were recorded using a polarimeter Perkin-Elmer 341.

**Materials:**

All non-aqueous reactions were performed under an argon atmosphere using oven-dried glassware. Toluene was distilled from sodium metal under nitrogen. Dienes **9**, **11**, **13**, **15**, **17**, **19**, **21** and **23** were synthesised and purified according to literature procedures. BMI.PF6 was prepared and purified as reported previously1 and dried overnight at 70°C under high vacuum to remove water traces2. All others chemical reagents and solvents were obtained from commercial sources and used without further purification. Analytical TLC were performed on Merck silica gel 60F254 plates, and visualised under UV-light. Chromatographic purifications were performed on a column with 230-400 mesh silica gel (Merck 9385) using the indicated solvent system.

**Synthesis of IL-catalyst 8:**

In a Schlenk flask, 1-[3-(4-isopropoxy-3-vinyl-phenyl)-propyl]-3-methyl-3H-imidazol-1-ium hexafluorophosphate **7** (159 mg, 0.37 mmol) was diluted in dry dichloromethane (37 mL). Copper (I) chloride (73 mg, 0.74 mmol) and Grubbs’ catalyst 2b (494 mg, 0.6 mmol, 1.5 equiv) were introduced. The resulting solution was degassed three times (vacuum/argon) and stirred for 30 hours at reflux. The solvent was evaporated under vacuum, the residue was dissolved in dry acetone (10 mL) and the insoluble materials were removed by filtration and washed with acetone (2 x 5 mL). The filtrate was evaporated under vacuum and then solubilised in the minimum amount of dichloromethane. The same amount of toluene was added and the solution was cooled at -10°C over 10h. The resulting green crystals were filtered and washed with cold toluene and dried under vacuum to afford the catalyst **8** (228 mg, 90 %).

**1H NMR** (400 MHz, CD2Cl2, 25oC, TMS): = 16.45 (s, 1H; Ru=CH), 8.25 (s, 1H; CH), 7.38 (dd, J(H,H)=8.5 and 1.7Hz, 1H; CH), 7.17 (m, 2H; 2CH), 7.07 (s; 3H; 3CH), 6.91 (s, 1H; 1CH), 6.74 (d, J(H,H) = 8.5Hz, 1H; CH), 6.59 (d, J(H,H) = 1.7 Hz, 1H; CH), 4.81 (sept, J(H,H) = 6.2 Hz, 1H; CH), 4.13 (m, 6H, 3CH2), 3.67 (s, 3H; CH3), 2.76 (t, J(H,H) = 6.8 Hz, 2H; CH2), 2.41 (s, 18H; 6CH3), 2.15 (quint, J(H,H) = 6.8 Hz, 2H; CH2), 1.19 (d, J(H,H) = 1.7 Hz, 6H; 2CH3).

**31P NMR** (162 MHz, CD2Cl2): = -143.1 (sept, J(P,F)= 711 Hz, 1P, PF6).

**19F NMR** (376 MHz, CD2Cl2): = -72.8 (d, J(F,P)= 711 Hz, 6F, PF6).

**HR-MS** (peak matching, MAB), calcd for [M+]: 749.2327, found: 749.2321

**Elemental analysis** (%) calcd for C38H49Cl2F6N4OPRu: C 51.01 , H 5.52, N 6.26; found: C 50.92, H 5.50, N 5.77.

**General procedure for RCM reactions in BMI.PF6/toluene (25/75):**

BMI.PF6 (1.25 mL) was introduced into a Schlenk flask and dried for 2 hours under vacuum at 70°C. The ionic liquid-catalyst **8** (21.7 mg, 0.025 mmol, 0.025 equiv) was added and the mixture was stirred for 1h at room temperature under vacuum to afford a complete dissolution of the catalyst. The diene (1 mmol, c = 0.2 M) was then introduced followed by dry toluene (3.75 mL) and the reaction mixture was stirred at the indicated temperature. The reaction mixture was then allowed to separate and the toluene layer was removed. The BMI.PF6 layer was successively washed with dry toluene (4 x 10 mL). The combined toluene extracts layers were evaporated to afford the crude product, which was examinated by 400 MHz 1H NMR spectroscopy to reveal complete conversion of diene and clean formation of the corresponding cyclised product. The BMI.PF6 phase containing the IL-catalyst **8** was dried under vacuum before its reuse with a new addition of diene and toluene.

**Procedure for ICP-MS measurement:**

All samples were prepared by weighing 5 mg of the crude compound (that was previously filtered through a slim bed of silica gel in order to remove BMI.PF6 traces) and then adding 10 mL of 0.12 M hydrochloric acid in glacial acetic acid. The analyses were performed on a PE Instrument Elan 6000 Inductive Coupled Plasma Mass Spectrometer (ICP-MS) using 99Ru and 101Ru isotopes, which are not interfered by molybdenum oxide. All samples were diluted 10 times in ultra pure water. The Ru level was determined by comparison with a standard Ru sample (10g/mL). The analyses have been realised by UT2A Company, France (<http://www.univ-pau.fr/ut2a>).

**Procedure for recover the BMI.PF6:**

The ionic liquid BMI.PF6 containing the decomposed IL-catalyst (5mL) was dissolved in 10 mL of dichloroethane. Black carbon (500 mg) was added and the resulting mixture was refluxed for 12 h. The mixture was cooled to room temperature and then filtered onto a plug of celite. The solvent was removed to afford the pure BMI.PF6 as a colorless oil which was finally dried for 4h at 70°C under vacuum. This recovered BMI.PF6 was used in a RCM reaction with a new loading of IL-catalyst **8** and substrate without lost of performance compared to the fresh one.

(1) Huddleston, J. G. ; Willauer, H. D. ; Swatloski, R. P. ; Visser A. E. ; Rogers, R. D.

*Chem. Commun*., **1998**, 1765-1766.

(2) Wasserscheid, P. ; Weldon, T. (Eds) *Ionic Liquids in Synthesis*, Wiley-VCH, **2003**,

chapter 2, 19.
